# Supplementary material for: Differences in Psychiatric Comorbidities and Gender Distribution among Three Clusters of Personality Disorders: A Nationwide Population-Based Study
Source: MDPI journal article supplement (doi:10.3390/jcm10153294), 2021-07-26

**Table S1.** Codes of International Classification of Diseases, Ninth Revision (ICD-9) for each mental disorder in the Diagnostic and Statistical Manual of Mental Disorders, Fifth Edition (DSM-5).

| Diagnostic categories (DSM-5)                      | Codes (ICD-9)                                                               |
|----------------------------------------------------|-----------------------------------------------------------------------------|
| Neurodevelopmental disorders                       | 299, 307.2, 307.3, 307.9, 314, 315, 317, 318, 319                           |
| Schizophrenia                                      | 295, 297.0, 297.1, 297.2, 298.3, 298.4, 298.8, 298.9                        |
| Bipolar disorders                                  | 296.0, 296.1, 296.4, 296.5, 296.6, 296.7, 296.80, 296.89, 301.13            |
| Depressive disorders <sup>a</sup>                  | 296.2, 296.3, 296.99, 300.4, 311, 625.4                                     |
| Anxiety disorders                                  | 300.00, 300.01, 300.02, 300.09, 300.2, 309.21, 313.23                       |
| Obsessive-compulsive disorders                     | 300.3, 300.7, 312.39, 698.4                                                 |
| Trauma and stressor disorders                      | 308.3, 309.0, 309.24, 309.28, 309.3, 309.4, 309.81, 309.89, 309.9, 313.89   |
| Dissociative disorders                             | 300.12, 300.13, 300.14, 300.15, 300.6                                       |
| Somatic symptom and related disorders              | 300.7, 300.8, 300.11, 300.19, 316                                           |
| Feeding and eating disorders                       | 307.1, 307.5                                                                |
| Elimination disorders                              | 307.6, 307.7, 787.60, 788.30, 788.39                                        |
| Sleep-wake disorders                               | 307.4, 327, 347, 780.5                                                      |
| Sexual dysfunctions                                | 302.7                                                                       |
| Gender dysphoria                                   | 302.6, 302.85                                                               |
| Disruptive, impulse-control, and conduct disorders | 312.32, 312.33, 312.34, 312.8, 312.9, 313.81                                |
| Substance and addictive disorders                  | 291.81, 291.4, 292.0, 292.2, 303, 304, 305, 312.31                          |
| Neurocognitive disorders                           | 290.1, 290.2, 290.3, 290.4, 294.1, 294.2, 331.0, 331.1, 331.2, 331.8, 331.9 |
| Paraphilic disorders                               | 302.2, 302.3, 302.4, 302.81, 302.82, 302.83, 302.84, 302.89, 302.9          |

<sup>a</sup>During the study period, if someone had an initial diagnosis of depressive disorder that was subsequently changed to bipolar disorders, the patient was excluded from the category of depressive disorders.

**Table S2.** Characteristics of individuals in cluster A, cluster B, and cluster C personality disorder groups after sensitivity analysis.

| Characteristics                                    | Cluster A<br>N = 570 | Cluster B<br>N = 3786 | Cluster C<br>N = 2340 | F       | <i>p</i>         |
|----------------------------------------------------|----------------------|-----------------------|-----------------------|---------|------------------|
| Gender                                             |                      |                       |                       | 192.14  | <b>&lt;.0001</b> |
| Male                                               | 366 (64.21)          | 1079 (28.50)          | 1057 (45.17)          |         |                  |
| Female                                             | 204 (35.79)          | 2707 (71.50)          | 1283 (54.83)          |         |                  |
| Age at diagnosis, years                            | 38.32 ± 20.51        | 28.28 ± 9.98          | 43.86 ± 15.63         | 1013.35 | <b>&lt;.0001</b> |
| Psychiatric comorbidities                          |                      |                       |                       |         |                  |
| Neurodevelopmental disorders                       | 66 (11.58)           | 195 (5.15)            | 74 (3.16)             | 34.70   | <b>&lt;.0001</b> |
| Schizophrenia                                      | 237 (41.58)          | 418 (11.04)           | 142 (6.07)            | 303.85  | <b>&lt;.0001</b> |
| Neurocognitive disorders                           | 70 (12.28)           | 22 (0.58)             | 75 (3.21)             | 149.50  | <b>&lt;.0001</b> |
| Bipolar disorders                                  | 62 (10.88)           | 913 (24.12)           | 254 (10.85)           | 99.29   | <b>&lt;.0001</b> |
| Trauma and stressor disorders                      | 81 (14.21)           | 824 (21.76)           | 372 (15.90)           | 21.02   | <b>&lt;.0001</b> |
| Feeding and eating disorders                       | 8 (1.40)             | 233 (6.15)            | 35 (1.50)             | 46.14   | <b>&lt;.0001</b> |
| Substance and addictive disorders                  | 37 (6.49)            | 874 (23.09)           | 159 (6.79)            | 172.16  | <b>&lt;.0001</b> |
| Depressive disorders                               | 281 (49.30)          | 2207 (58.29)          | 1575 (67.31)          | 42.03   | <b>&lt;.0001</b> |
| Anxiety disorders                                  | 307 (53.86)          | 1999 (52.80)          | 1791 (76.54)          | 188.60  | <b>&lt;.0001</b> |
| Obsessive-compulsive disorders                     | 87 (15.26)           | 252 (6.66)            | 425 (18.16)           | 102.27  | <b>&lt;.0001</b> |
| Somatic symptom disorders                          | 34 (5.96)            | 157 (4.15)            | 221 (9.44)            | 35.52   | <b>&lt;.0001</b> |
| Sleep-wake disorders                               | 302 (52.98)          | 2498 (65.98)          | 1727 (73.80)          | 51.39   | <b>&lt;.0001</b> |
| Dissociative disorders                             | 4 (0.70)             | 42 (1.11)             | 8 (0.34)              | 5.37    | <u>.0047</u>     |
| Elimination disorders                              | 23 (4.04)            | 45 (1.19)             | 73 (3.12)             | 18.80   | <b>&lt;.0001</b> |
| Sexual dysfunctions                                | 8 (1.40)             | 22 (0.58)             | 56 (2.39)             | 18.86   | <b>&lt;.0001</b> |
| Gender dysphoria                                   | 3 (0.53)             | 10 (0.26)             | 2 (0.09)              | 2.31    | <u>.0997</u>     |
| Disruptive, impulse-control, and conduct disorders | 6 (1.05)             | 42 (1.11)             | 6 (0.26)              | 6.82    | <u>.0011</u>     |
| Paraphilic disorders                               | 4 (0.70)             | 5 (0.13)              | 9 (0.38)              | 3.90    | <u>.0203</u>     |

Data are expressed as N (%) or the mean ± standard deviation. Bold type indicates statistical significance ( $p < 0.001$ ), the exact value of Bonferroni correction is 0.0024 (0.05/21). Bottom line indicates that the proportion of all control groups is less than 5%, and its statistical power may be weak.

**Table S3.** The components produced by principal component analysis of cluster A personality disorder subgroups.

| Characteristics                                    | Factor 1 | Factor 2 | Factor 3 | Factor 4 | Factor 5 | Factor 6 | Factor 7 | Factor 8 |
|----------------------------------------------------|----------|----------|----------|----------|----------|----------|----------|----------|
| Psychiatric comorbidities                          |          |          |          |          |          |          |          |          |
| Anxiety disorders                                  | 0.709    | 0.083    | 0.076    | 0.040    | 0.030    | 0.103    | 0.119    | 0.079    |
| Sleep-wake disorders                               | 0.699    | -0.060   | -0.119   | 0.192    | 0.131    | 0.134    | 0.044    | 0.079    |
| Bipolar disorders                                  | 0.319    | 0.660    | -0.270   | 0.089    | -0.266   | 0.041    | 0.180    | 0.010    |
| Trauma and stressor disorders                      | 0.126    | 0.473    | -0.092   | -0.075   | 0.305    | 0.165    | -0.046   | -0.290   |
| Depressive disorders                               | 0.289    | -0.606   | 0.325    | -0.169   | 0.321    | 0.185    | -0.068   | -0.125   |
| Paraphilic disorders                               | -0.133   | 0.139    | 0.563    | 0.520    | -0.125   | 0.146    | -0.047   | 0.007    |
| Gender dysphoria                                   | -0.098   | 0.067    | 0.490    | 0.414    | -0.386   | 0.188    | -0.025   | -0.091   |
| Obsessive-compulsive disorders                     | 0.245    | 0.131    | 0.423    | -0.134   | 0.050    | -0.388   | 0.249    | -0.056   |
| Neurocognitive disorders                           | -0.084   | -0.249   | -0.378   | 0.557    | 0.179    | -0.251   | -0.002   | -0.013   |
| Elimination disorders                              | 0.057    | 0.149    | -0.161   | 0.531    | 0.467    | -0.033   | -0.209   | -0.103   |
| Disruptive, impulse-control, and conduct disorders | -0.249   | 0.247    | 0.349    | 0.025    | 0.440    | 0.126    | 0.060    | 0.277    |
| Somatic symptom disorders                          | 0.394    | 0.063    | 0.308    | 0.062    | 0.184    | -0.492   | 0.039    | -0.081   |
| Feeding and eating disorders                       | 0.055    | -0.086   | -0.025   | -0.052   | 0.000    | 0.428    | 0.600    | -0.290   |
| Dissociative disorders                             | 0.097    | -0.128   | 0.002    | 0.054    | -0.080   | -0.194   | 0.332    | 0.665    |
| Substance and addictive disorders                  | 0.328    | -0.063   | 0.117    | -0.126   | -0.026   | 0.210    | -0.359   | -0.011   |
| Sexual dysfunctions                                | 0.164    | 0.066    | -0.063   | -0.005   | 0.018    | 0.403    | -0.291   | 0.501    |
| Schizophrenia                                      | 0.208    | 0.173    | 0.085    | -0.238   | -0.262   | -0.235   | -0.455   | -0.067   |
| Neurodevelopmental disorders                       | -0.320   | 0.376    | 0.152    | -0.304   | 0.414    | 0.017    | 0.033    | 0.137    |

**Table S4.** The components produced by principal component analysis of cluster B personality disorder subgroups.

| Characteristics                                    | Factor 1 | Factor 2 | Factor 3 | Factor 4 | Factor 5 | Factor 6 | Factor 7 | Factor 8 |
|----------------------------------------------------|----------|----------|----------|----------|----------|----------|----------|----------|
| Psychiatric comorbidities                          |          |          |          |          |          |          |          |          |
| Bipolar disorders                                  | 0.770    | -0.394   | -0.202   | -0.089   | -0.061   | -0.024   | 0.055    | 0.069    |
| Depressive disorders                               | -0.627   | 0.638    | 0.139    | -0.017   | 0.069    | 0.004    | 0.009    | -0.048   |
| Sleep-wake disorders                               | 0.444    | 0.584    | -0.131   | 0.025    | 0.142    | 0.101    | -0.018   | -0.096   |
| Obsessive-compulsive disorders                     | 0.221    | 0.076    | 0.654    | -0.209   | -0.157   | -0.024   | 0.056    | 0.116    |
| Sexual dysfunctions                                | 0.014    | 0.079    | 0.116    | 0.426    | -0.226   | -0.239   | 0.271    | 0.386    |
| Feeding and eating disorders                       | 0.193    | 0.020    | 0.048    | -0.551   | 0.108    | -0.029   | 0.244    | 0.099    |
| Dissociative disorders                             | 0.057    | -0.018   | 0.170    | -0.058   | 0.609    | -0.447   | 0.018    | -0.039   |
| Gender dysphoria                                   | -0.025   | -0.090   | 0.129    | -0.009   | 0.554    | 0.067    | -0.240   | 0.291    |
| Paraphilic disorders                               | 0.006    | 0.010    | 0.073    | -0.037   | 0.197    | 0.580    | 0.656    | -0.074   |
| Disruptive, impulse-control, and conduct disorders | 0.010    | -0.136   | 0.323    | 0.018    | -0.123   | 0.003    | -0.068   | -0.679   |
| Elimination disorders                              | 0.090    | 0.059    | 0.051    | -0.104   | -0.101   | 0.426    | -0.515   | 0.314    |
| Neurocognitive disorders                           | 0.041    | 0.056    | 0.066    | 0.497    | 0.057    | 0.155    | 0.122    | 0.217    |
| Trauma and stressor disorders                      | 0.071    | -0.269   | 0.141    | 0.359    | 0.270    | 0.082    | -0.185   | -0.218   |
| Schizophrenia                                      | 0.269    | 0.048    | 0.269    | 0.172    | -0.029   | -0.311   | 0.167    | 0.069    |
| Neurodevelopmental disorders                       | -0.060   | -0.401   | 0.362    | 0.195    | 0.102    | 0.289    | -0.011   | -0.014   |
| Substance and addictive disorders                  | 0.352    | 0.256    | -0.207   | 0.275    | -0.069   | -0.011   | -0.069   | -0.236   |
| Somatic symptom disorders                          | 0.261    | 0.226    | 0.499    | -0.062   | -0.229   | 0.015    | -0.160   | 0.033    |
| Anxiety disorders                                  | 0.509    | 0.487    | 0.020    | 0.090    | 0.216    | 0.126    | -0.053   | -0.080   |

**Table S5.** The components produced by principal component analysis of cluster C personality disorder subgroups.

| Characteristics                                    | Factor 1 | Factor 2 | Factor 3 | Factor 4 | Factor 5 | Factor 6 | Factor 7 | Factor 8 | Factor 9 |
|----------------------------------------------------|----------|----------|----------|----------|----------|----------|----------|----------|----------|
| Psychiatric comorbidities                          |          |          |          |          |          |          |          |          |          |
| Depressive disorders                               | 0.717    | -0.444   | -0.067   | 0.087    | 0.028    | 0.123    | 0.063    | 0.026    | 0.001    |
| Bipolar disorders                                  | -0.531   | 0.656    | 0.093    | 0.002    | 0.075    | 0.009    | -0.020   | -0.013   | -0.028   |
| Anxiety disorders                                  | 0.380    | 0.546    | 0.079    | 0.204    | -0.093   | -0.020   | -0.076   | 0.046    | -0.005   |
| Obsessive-compulsive disorders                     | 0.029    | -0.118   | 0.670    | 0.145    | -0.243   | -0.234   | 0.024    | -0.020   | -0.243   |
| Schizophrenia                                      | -0.119   | -0.038   | 0.505    | 0.218    | 0.138    | 0.366    | 0.063    | 0.256    | 0.098    |
| Somatic symptom disorders                          | 0.319    | 0.061    | 0.490    | 0.147    | -0.127   | -0.266   | -0.181   | -0.112   | 0.216    |
| Sexual dysfunctions                                | 0.108    | 0.095    | 0.123    | -0.498   | -0.320   | 0.180    | 0.252    | -0.112   | 0.046    |
| Dissociative disorders                             | -0.028   | -0.067   | 0.223    | -0.015   | 0.525    | 0.258    | -0.215   | -0.257   | 0.505    |
| Neurocognitive disorders                           | 0.125    | 0.022    | 0.069    | -0.374   | 0.458    | -0.211   | 0.249    | 0.247    | 0.178    |
| Paraphilic disorders                               | -0.018   | 0.084    | 0.180    | -0.355   | -0.334   | 0.480    | 0.164    | -0.193   | 0.090    |
| Disruptive, impulse-control, and conduct disorders | -0.057   | -0.105   | -0.053   | 0.303    | -0.121   | 0.052    | 0.619    | 0.057    | 0.245    |
| Substance and addictive disorders                  | 0.051    | 0.200    | -0.056   | 0.439    | 0.149    | 0.219    | 0.458    | -0.045   | -0.085   |
| Gender dysphoria                                   | -0.072   | -0.077   | 0.072    | 0.026    | 0.037    | 0.339    | -0.187   | 0.677    | -0.263   |
| Feeding and eating disorders                       | -0.041   | -0.079   | 0.087    | 0.089    | 0.361    | 0.055    | 0.115    | -0.495   | -0.561   |
| Trauma and stressor disorders                      | -0.162   | 0.007    | -0.247   | 0.282    | -0.232   | -0.183   | -0.035   | 0.036    | 0.294    |
| Elimination disorders                              | 0.140    | 0.173    | 0.139    | -0.281   | 0.204    | -0.389   | 0.348    | 0.230    | -0.109   |
| Neurodevelopmental disorders                       | -0.412   | -0.251   | 0.174    | 0.062    | -0.029   | -0.242   | 0.148    | -0.005   | 0.193    |
| Sleep-wake disorders                               | 0.518    | 0.529    | -0.076   | 0.079    | 0.057    | 0.050    | -0.027   | 0.001    | 0.085    |

**Table S6.** Gender differences in cluster A, cluster B, and cluster C personality disorder groups after sensitivity analysis.

| Characteristics                                   | Cluster A       |                   |                     |                   | Cluster B        |                    |                     |                   | Cluster C        |                    |                     |                   |
|---------------------------------------------------|-----------------|-------------------|---------------------|-------------------|------------------|--------------------|---------------------|-------------------|------------------|--------------------|---------------------|-------------------|
|                                                   | Male<br>N = 366 | Female<br>N = 204 | t or X <sup>2</sup> | p                 | Male<br>N = 1079 | Female<br>N = 2707 | t or X <sup>2</sup> | p                 | Male<br>N = 1057 | Female<br>N = 1283 | t or X <sup>2</sup> | p                 |
| Age at diagnosis, years                           | 33.52 ± 17.94   | 46.94 ± 22.00     | 7.88                | <b>&lt;0.0001</b> | 26.34 ± 10.21    | 29.05 ± 9.79       | 7.60                | <b>&lt;0.0001</b> | 42.93 ± 16.54    | 44.63 ± 14.80      | 2.63                | <b>&lt;0.0001</b> |
| Psychiatric comorbidities                         |                 |                   |                     |                   |                  |                    |                     |                   |                  |                    |                     |                   |
| Neurodevelopmental disorders                      | 54 (14.75)      | 12 (5.88)         | 10.07               | 0.0015            | 113 (10.47)      | 82 (3.03)          | 87.50               | <b>&lt;0.0001</b> | 57 (5.39)        | 17 (1.33)          | 31.31               | <b>&lt;0.0001</b> |
| Disruptive, impulse-control, and conduct disorder | 5 (1.37)        | 1 (0.49)          | 0.96                | <u>0.3260</u>     | 18 (1.67)        | 24 (0.89)          | 4.30                | <u>0.0382</u>     | 6 (0.57)         | 0 (0.00)           | 7.30                | <u>0.0069</u>     |
| Schizophrenia                                     | 151 (41.26)     | 86 (42.16)        | 0.04                | 0.8344            | 130 (12.05)      | 288 (10.64)        | 1.56                | 0.2117            | 83 (7.85)        | 59 (4.60)          | 10.76               | 0.0010            |
| Trauma and stressor disorders                     | 59 (16.12)      | 22 (10.78)        | 3.06                | 0.0803            | 303 (28.08)      | 521 (19.25)        | 35.37               | <b>&lt;0.0001</b> | 179 (16.93)      | 193 (15.04)        | 1.55                | 0.2129            |
| Substance and addictive disorders                 | 29 (7.92)       | 8 (3.92)          | 3.46                | 0.0630            | 253 (23.45)      | 621 (22.94)        | 0.11                | 0.7382            | 89 (8.42)        | 70 (5.46)          | 8.04                | 0.0046            |
| Obsessive-compulsive disorders                    | 67 (18.31)      | 20 (9.80)         | 7.32                | 0.0068            | 76 (7.04)        | 176 (6.50)         | 0.36                | 0.5459            | 247 (23.37)      | 178 (13.87)        | 35.15               | <b>&lt;0.0001</b> |
| Sexual dysfunctions                               | 8 (2.19)        | 0 (0.00)          | 4.52                | <u>0.0335</u>     | 18 (1.67)        | 4 (0.15)           | 30.87               | <b>&lt;0.0001</b> | 47 (4.45)        | 9 (0.70)           | 34.80               | <b>&lt;0.0001</b> |
| Gender dysphoria                                  | 3 (0.82)        | 0 (0.00)          | 1.68                | <u>0.1948</u>     | 7 (0.65)         | 3 (0.11)           | 8.47                | <u>0.0036</u>     | 2 (0.19)         | 0 (0.00)           | 2.43                | <u>0.1191</u>     |
| Paraphilic disorders                              | 3 (0.82)        | 1 (0.49)          | 0.20                | <u>0.6515</u>     | 2 (0.19)         | 3 (0.11)           | 0.32                | <u>0.5687</u>     | 7 (0.66)         | 2 (0.16)           | 3.88                | <u>0.0489</u>     |
| Neurocognitive disorders                          | 27 (7.38)       | 43 (21.08)        | 22.83               | <b>&lt;0.0001</b> | 5 (0.46)         | 17 (0.63)          | 0.36                | <u>0.5475</u>     | 34 (3.22)        | 41 (3.20)          | 0.00                | <u>0.9771</u>     |
| Bipolar disorders                                 | 35 (9.56)       | 27 (13.24)        | 1.82                | 0.1770            | 168 (15.57)      | 745 (27.52)        | 60.22               | <b>&lt;0.0001</b> | 100 (9.46)       | 154 (12.00)        | 3.87                | 0.0491            |
| Depressive disorders                              | 186 (50.82)     | 95 (46.57)        | 0.95                | 0.3305            | 554 (51.34)      | 1653 (61.06)       | 29.98               | <b>&lt;0.0001</b> | 686 (64.90)      | 889 (69.29)        | 5.08                | 0.0243            |
| Anxiety disorders                                 | 190 (51.91)     | 117 (57.35)       | 1.56                | 0.2117            | 413 (38.28)      | 1586 (58.59)       | 127.73              | <b>&lt;0.0001</b> | 787 (74.46)      | 1004 (78.25)       | 4.66                | 0.0310            |
| Feeding and eating disorders                      | 3 (0.82)        | 5 (2.45)          | 2.52                | <u>0.1125</u>     | 10 (0.93)        | 223 (8.24)         | 71.40               | <b>&lt;0.0001</b> | 5 (0.47)         | 30 (2.34)          | 13.69               | <u>0.0002</u>     |
| Elimination disorders                             | 10 (2.73)       | 13 (6.37)         | 4.48                | 0.0342            | 6 (0.56)         | 39 (1.44)          | 5.14                | <u>0.0234</u>     | 28 (2.65)        | 45 (3.51)          | 1.41                | <u>0.2346</u>     |
| Sleep-wake disorders                              | 168 (45.90)     | 134 (65.69)       | 20.58               | <b>&lt;0.0001</b> | 523 (48.47)      | 1975 (72.96)       | 206.11              | <b>&lt;0.0001</b> | 717 (67.83)      | 1010 (78.72)       | 35.54               | <b>&lt;0.0001</b> |
| Dissociative disorders                            | 0 (0.00)        | 4 (1.96)          | 7.23                | <u>0.0072</u>     | 7 (0.65)         | 35 (1.29)          | 2.92                | <u>0.0876</u>     | 1 (0.09)         | 7 (0.55)           | 3.46                | <u>0.0629</u>     |
| Somatic symptom disorders <sup>a</sup>            | 20 (5.46)       | 14 (6.86)         | 0.46                | 0.4992            | 26 (2.41)        | 131 (4.84)         | 11.46               | <u>0.0007</u>     | 107 (10.12)      | 114 (8.89)         | 1.04                | 0.3083            |

Data are expressed as N (%) or the mean ± standard deviation. Bold type indicates statistical significance ( $p < 0.001$ ), the exact value of Bonferroni correction is 0.0025 (0.05/20). Bottom line indicates that the proportion of all control groups is less than 5%, and its statistical power may be weak. <sup>a</sup> The proportion is not consistently predominant of one gender (male or female) across three clusters of personality disorders.

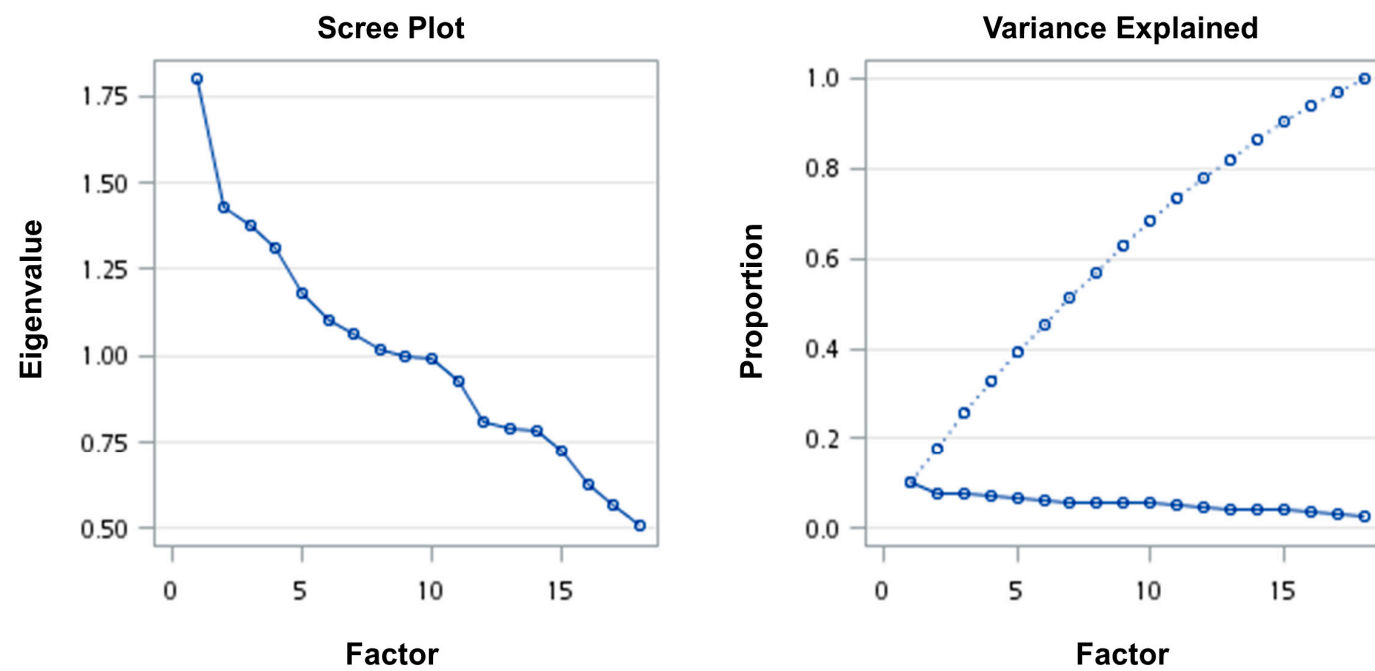

Figure S1. Scree plot and variance explained of cluster A personality disorder.

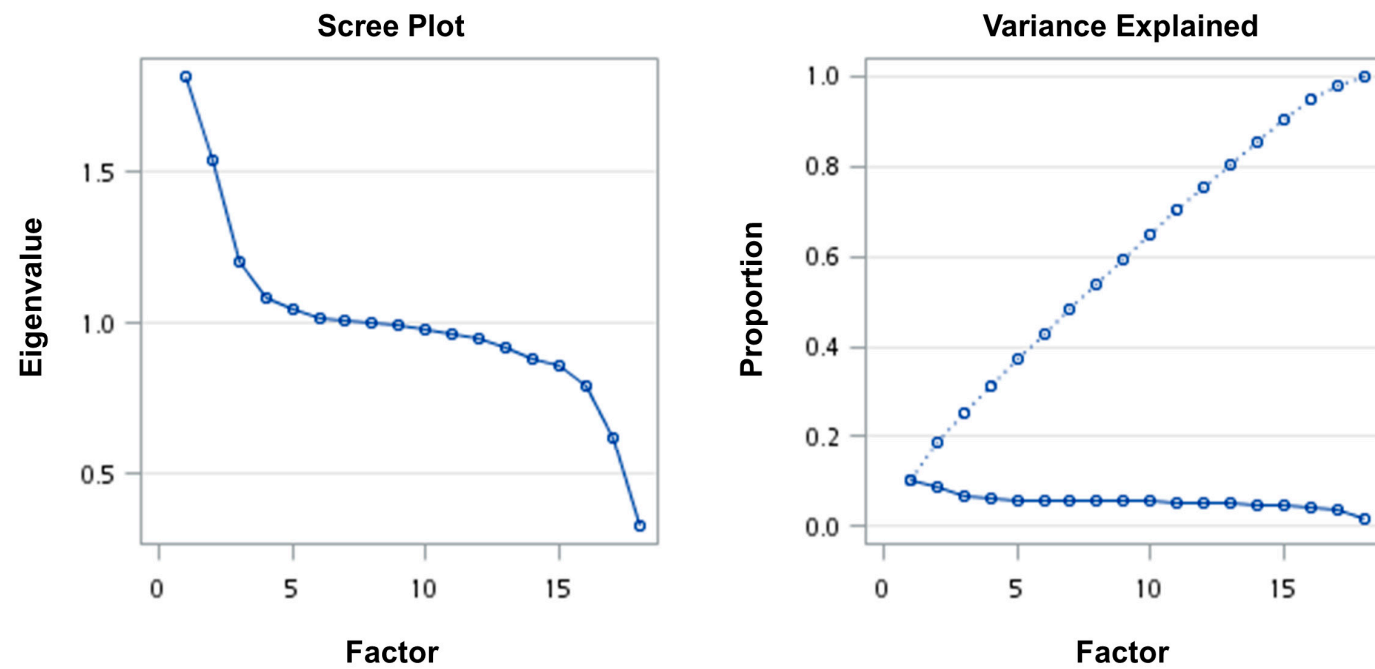

Figure S2. Scree plot and variance explained of cluster B personality disorder.



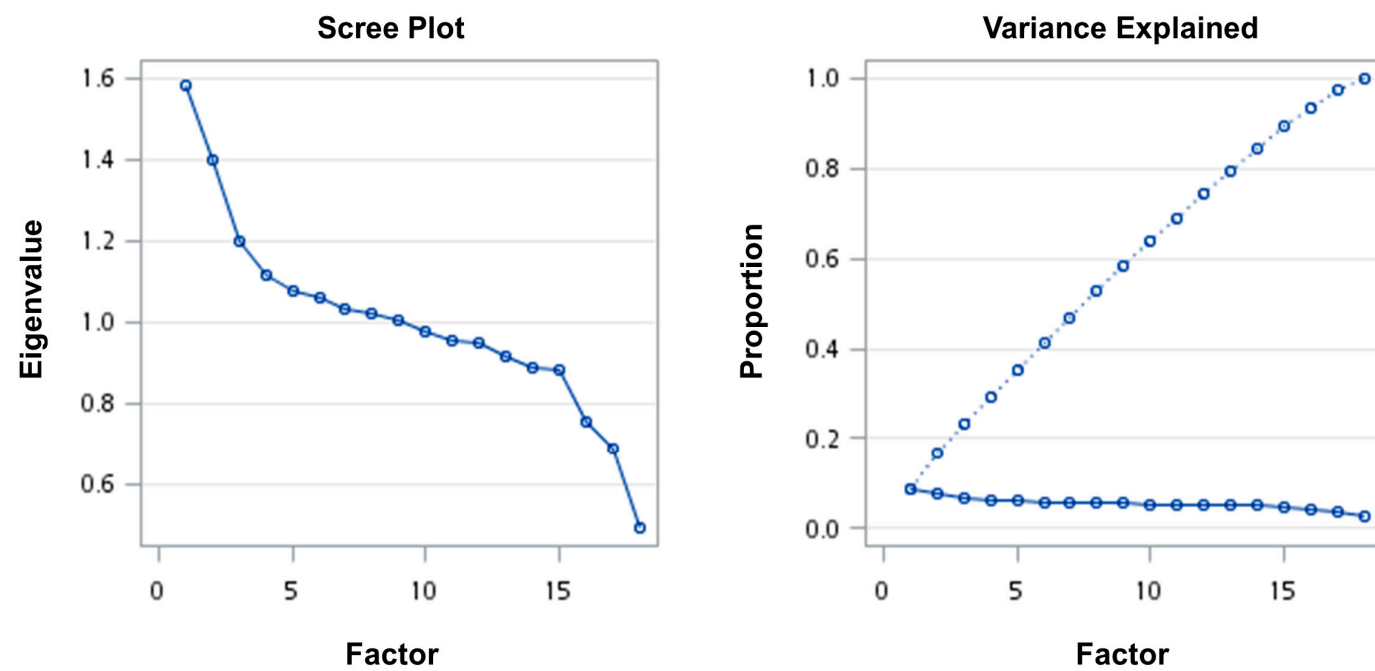

Figure S3. Scree plot and variance explained of cluster C personality disorder.

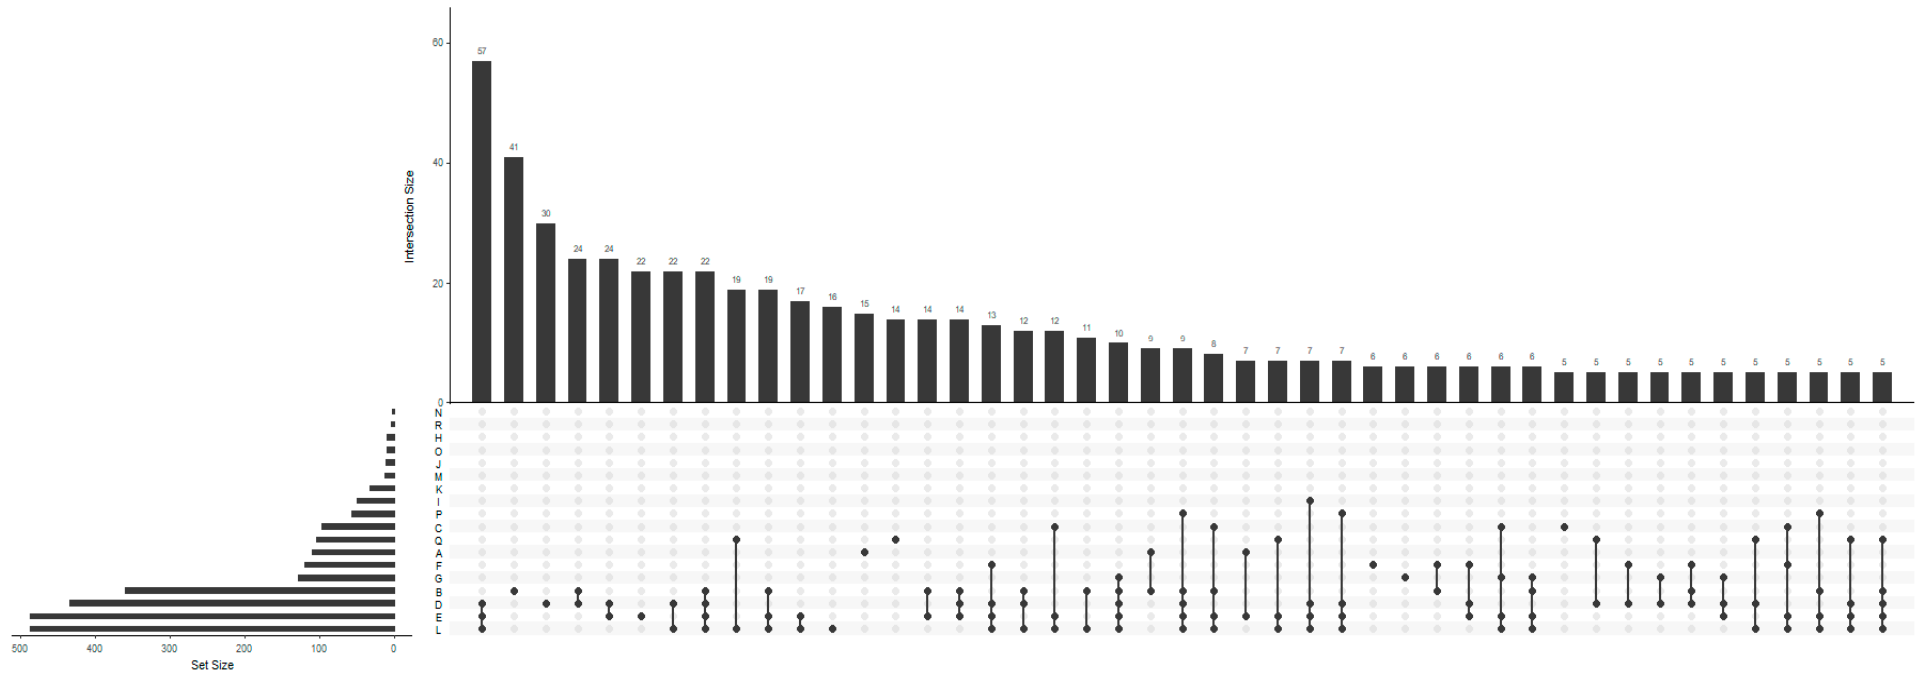

**Figure S4.** Upset plot of cluster A personality disorder. The Upset plot shows the part where the number of intersections is greater than 5. Abbreviation: A, Neurodevelopmental disorders; B, Schizophrenia; C, Bipolar disorders; D, Depressive disorders; E, Anxiety disorders; F, Obsessive-compulsive disorders; G, Trauma and stressor disorders; H, Dissociative disorders; I, Somatic symptom disorders; J, Feeding and eating disorders; K, Elimination disorders; L, Sleep-wake disorders; M, Sexual dysfunctions; N, Gender dysphoria; O, Disruptive, impulse-control, and conduct disorders; P, Substance and addictive disorders; Q, Neurocognitive disorders; R, Paraphilic disorders.

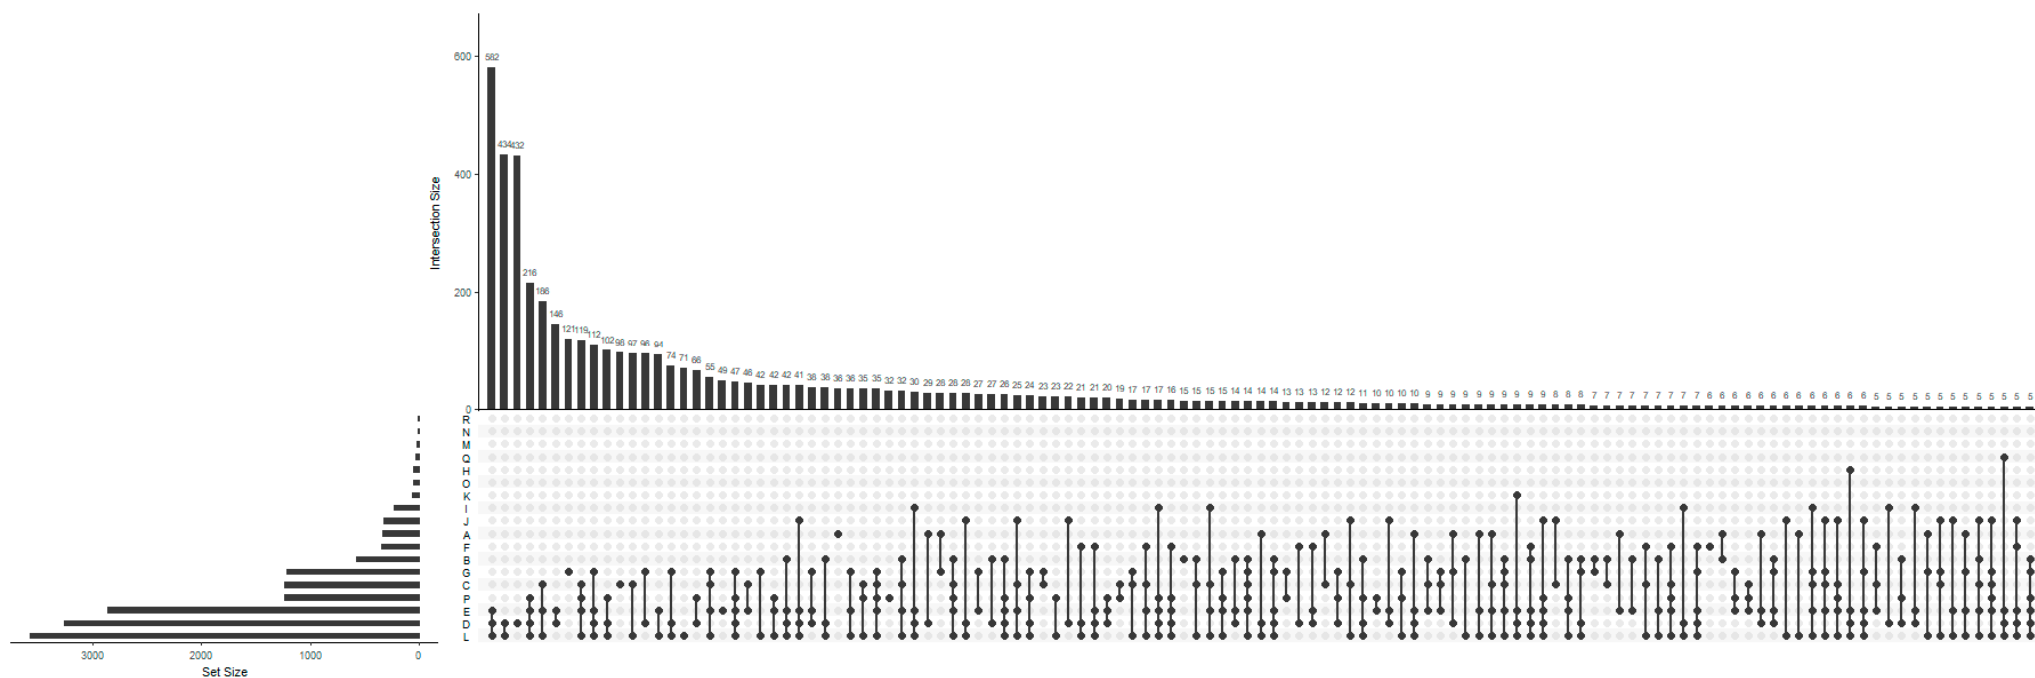

Supplement: s1 [file s1]
